# Supplementary material for: Synthesis and Adsorption Property of SiO2@Co(OH)2 Core-Shell Nanoparticles
Source: MDPI journal article supplement (doi:10.3390/nano5020554), 2015-04-03
Supplement: s1 [file s1]

## Supplementary Materials

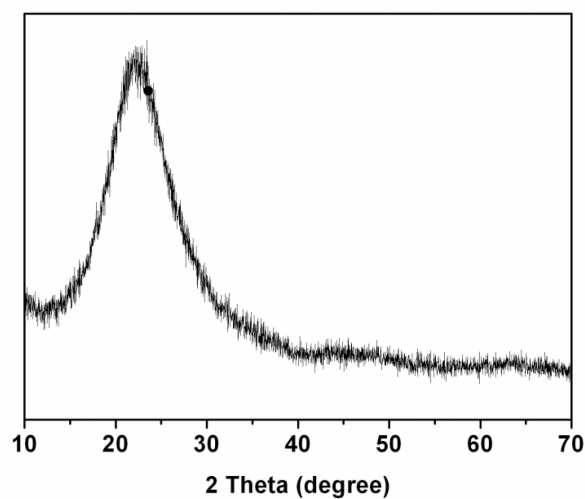

**Figure S1.** X-ray diffraction (XRD) pattern of core-shell composite.

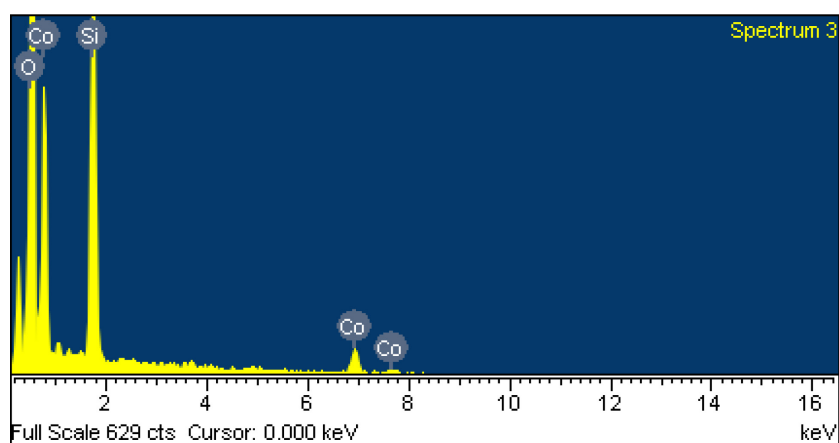

**Figure S2.** Energy dispersive X-ray spectra (EDS) pattern of core-shell composite.

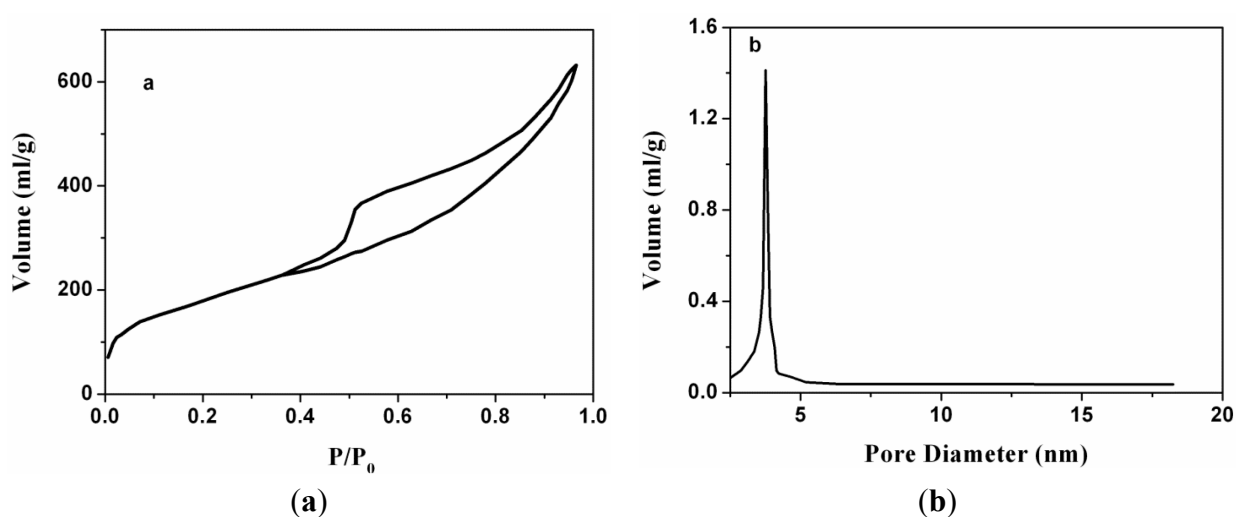

**Figure S3.** N<sub>2</sub> adsorption-desorption isotherm (a) and pore-size distribution (b) of core-shell composite.

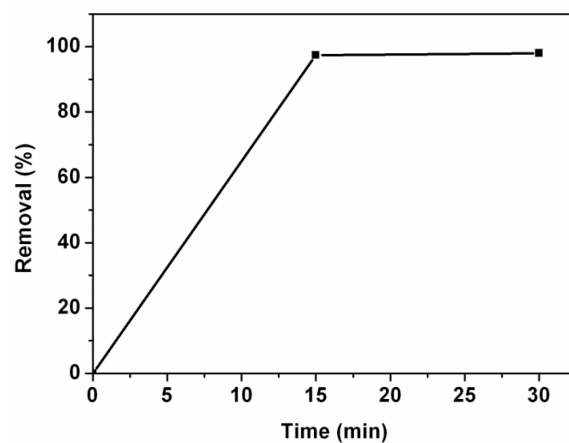

**Figure S4.** Effect of time on percent removal of Rhodamine B (RB).

© 2015 by the author; licensee MDPI, Basel, Switzerland. This article is an open access article distributed under the terms and conditions of the Creative Commons Attribution license (<http://creativecommons.org/licenses/by/4.0/>).
